# Supplementary material for: A longitudinal assessment of host-microbe-parasite interactions resolves the zebrafish gut microbiome’s link to Pseudocapillaria tomentosa infection and pathology
Source: Microbiome. 2019 Jan 24;7:10. doi: 10.1186/s40168-019-0622-9 (PMC6346533; doi:10.1186/s40168-019-0622-9)
Supplement: Supplementary file 2 — Table S4. Microbiome sample metadata table (XLSX 54 kb) [file 40168_2019_622_MOESM2_ESM.xlsx]

## Sheet: pcap_metadata_final.txt
Rownames	Seq_ID	Sample.ID	DaysPE	Exposure	Sex	Weight_.mg.	Length_.mm.	Total	Mature	Immature	Dead	Worms.histo	Hyperplasia	Inflammation	condition_factor	tank	hist_total	daype_exp
lane1-s003-index-ACACCTGGTGAT-Z0374	lane1-s003-index-ACACCTGGTGAT-Z0374	pNC1-1	0	Unexposed	NA	NA	NA	NA	NA	NA	NA	NA	NA	NA	NA	1	NA	0_Unexposed
lane1-s004-index-TATCGTTGACCA-Z0375	lane1-s004-index-TATCGTTGACCA-Z0375	pNC1-2	0	Unexposed	NA	NA	NA	NA	NA	NA	NA	NA	NA	NA	NA	1	NA	0_Unexposed
lane1-s005-index-TTACTGTGCGAT-Z0376	lane1-s005-index-TTACTGTGCGAT-Z0376	pNC1-3	0	Unexposed	NA	NA	NA	NA	NA	NA	NA	NA	NA	NA	NA	1	NA	0_Unexposed
lane1-s006-index-AGGCTACACGAC-Z0377	lane1-s006-index-AGGCTACACGAC-Z0377	pNC1-4	0	Unexposed	NA	NA	NA	NA	NA	NA	NA	NA	NA	NA	NA	1	NA	0_Unexposed
lane1-s007-index-CTAACCTCCGCT-Z0378	lane1-s007-index-CTAACCTCCGCT-Z0378	pNC1-5	0	Unexposed	NA	NA	NA	NA	NA	NA	NA	NA	NA	NA	NA	1	NA	0_Unexposed
lane1-s008-index-GAACCAAAGGAT-Z0379	lane1-s008-index-GAACCAAAGGAT-Z0379	pNC2-1	0	Unexposed	NA	NA	NA	NA	NA	NA	NA	NA	NA	NA	NA	2	NA	0_Unexposed
lane1-s009-index-GTATGCGCTGTA-Z0380	lane1-s009-index-GTATGCGCTGTA-Z0380	pNC2-2	0	Unexposed	NA	NA	NA	NA	NA	NA	NA	NA	NA	NA	NA	2	NA	0_Unexposed
lane1-s010-index-GTACATACCGGT-Z0381	lane1-s010-index-GTACATACCGGT-Z0381	pNC2-3	0	Unexposed	NA	NA	NA	NA	NA	NA	NA	NA	NA	NA	NA	2	NA	0_Unexposed
lane1-s011-index-TCCGACACAATT-Z0382	lane1-s011-index-TCCGACACAATT-Z0382	pNC2-4	0	Unexposed	NA	NA	NA	NA	NA	NA	NA	NA	NA	NA	NA	2	NA	0_Unexposed
lane1-s012-index-CCAGTGTATGCA-Z0383	lane1-s012-index-CCAGTGTATGCA-Z0383	pNC2-5	0	Unexposed	NA	NA	NA	NA	NA	NA	NA	NA	NA	NA	NA	2	NA	0_Unexposed
lane1-s013-index-CCTCGTTCGACT-Z0384	lane1-s013-index-CCTCGTTCGACT-Z0384	pNC3-1	0	Unexposed	NA	NA	NA	NA	NA	NA	NA	NA	NA	NA	NA	3	NA	0_Unexposed
lane1-s014-index-TGAGTCACTGGT-Z0385	lane1-s014-index-TGAGTCACTGGT-Z0385	pNC3-2	0	Unexposed	NA	NA	NA	NA	NA	NA	NA	NA	NA	NA	NA	3	NA	0_Unexposed
lane1-s015-index-GACTTGGTATTC-Z0386	lane1-s015-index-GACTTGGTATTC-Z0386	pNC3-3	0	Unexposed	NA	NA	NA	NA	NA	NA	NA	NA	NA	NA	NA	3	NA	0_Unexposed
lane1-s016-index-TACACGATCTAC-Z0387	lane1-s016-index-TACACGATCTAC-Z0387	pNC3-4	0	Unexposed	NA	NA	NA	NA	NA	NA	NA	NA	NA	NA	NA	3	NA	0_Unexposed
lane1-s017-index-GCACACACGTTA-Z0388	lane1-s017-index-GCACACACGTTA-Z0388	pNC3-5	0	Unexposed	NA	NA	NA	NA	NA	NA	NA	NA	NA	NA	NA	3	NA	0_Unexposed
lane1-s018-index-CACGCCATAATG-Z0389	lane1-s018-index-CACGCCATAATG-Z0389	pPC1-1	0	Exposed	NA	NA	NA	NA	NA	NA	NA	NA	NA	NA	NA	4	NA	0_Exposed
lane1-s019-index-CAGGCGTATTGG-Z0390	lane1-s019-index-CAGGCGTATTGG-Z0390	pPC1-2	0	Exposed	NA	NA	NA	NA	NA	NA	NA	NA	NA	NA	NA	4	NA	0_Exposed
lane1-s020-index-GGATCGCAGATC-Z0391	lane1-s020-index-GGATCGCAGATC-Z0391	pPC1-3	0	Exposed	NA	NA	NA	NA	NA	NA	NA	NA	NA	NA	NA	4	NA	0_Exposed
lane1-s021-index-GCTGATGAGCTG-Z0392	lane1-s021-index-GCTGATGAGCTG-Z0392	pPC1-4	0	Exposed	NA	NA	NA	NA	NA	NA	NA	NA	NA	NA	NA	4	NA	0_Exposed
lane1-s022-index-AGCTGTTGTTTG-Z0393	lane1-s022-index-AGCTGTTGTTTG-Z0393	pPC1-5	0	Exposed	NA	NA	NA	NA	NA	NA	NA	NA	NA	NA	NA	4	NA	0_Exposed
lane1-s023-index-GGATGGTGTTGC-Z0394	lane1-s023-index-GGATGGTGTTGC-Z0394	pPC2-1	0	Exposed	NA	NA	NA	NA	NA	NA	NA	NA	NA	NA	NA	5	NA	0_Exposed
lane1-s024-index-GCGATATATCGC-Z0395	lane1-s024-index-GCGATATATCGC-Z0395	pPC2-2	0	Exposed	NA	NA	NA	NA	NA	NA	NA	NA	NA	NA	NA	5	NA	0_Exposed
lane1-s025-index-TAGGATTGCTCG-Z0396	lane1-s025-index-TAGGATTGCTCG-Z0396	pPC2-3	0	Exposed	NA	NA	NA	NA	NA	NA	NA	NA	NA	NA	NA	5	NA	0_Exposed
lane1-s026-index-ATGTGCACGACT-Z0397	lane1-s026-index-ATGTGCACGACT-Z0397	pPC2-4	0	Exposed	NA	NA	NA	NA	NA	NA	NA	NA	NA	NA	NA	5	NA	0_Exposed
lane1-s027-index-ACGCGCAGATAC-Z0398	lane1-s027-index-ACGCGCAGATAC-Z0398	pPC2-5	0	Exposed	NA	NA	NA	NA	NA	NA	NA	NA	NA	NA	NA	5	NA	0_Exposed
lane1-s028-index-GACTTTCCCTCG-Z0399	lane1-s028-index-GACTTTCCCTCG-Z0399	pPC3-1	0	Exposed	NA	NA	NA	NA	NA	NA	NA	NA	NA	NA	NA	6	NA	0_Exposed
lane1-s029-index-ATCCCGAATTTG-Z0400	lane1-s029-index-ATCCCGAATTTG-Z0400	pPC3-2	0	Exposed	NA	NA	NA	NA	NA	NA	NA	NA	NA	NA	NA	6	NA	0_Exposed
lane1-s030-index-GTTGGTCAATCT-Z0401	lane1-s030-index-GTTGGTCAATCT-Z0401	pPC3-3	0	Exposed	NA	NA	NA	NA	NA	NA	NA	NA	NA	NA	NA	6	NA	0_Exposed
lane1-s031-index-TAGCTCGTAACT-Z0402	lane1-s031-index-TAGCTCGTAACT-Z0402	pPC3-4	0	Exposed	NA	NA	NA	NA	NA	NA	NA	NA	NA	NA	NA	6	NA	0_Exposed
lane1-s032-index-CAGTGCATATGC-Z0403	lane1-s032-index-CAGTGCATATGC-Z0403	pPC3-5	0	Exposed	NA	NA	NA	NA	NA	NA	NA	NA	NA	NA	NA	6	NA	0_Exposed
lane1-s033-index-TCACGGGAGTTG-Z0404	lane1-s033-index-TCACGGGAGTTG-Z0404	NC1-1	7	Unexposed	F	377	26	0	0	0	0	0	0	0	2.145	1	0	7_Unexposed
lane1-s034-index-CTGCTAACGCAA-Z0405	lane1-s034-index-CTGCTAACGCAA-Z0405	NC1-2	7	Unexposed	F	372	27.5	0	0	0	0	0	0	0	1.789	1	0	7_Unexposed
lane1-s035-index-TTAGGGCTCGTA-Z0406	lane1-s035-index-TTAGGGCTCGTA-Z0406	NC1-3	7	Unexposed	F	273	26.5	0	0	0	0	0	0	0	1.467	1	0	7_Unexposed
lane1-s036-index-TCTAGCGTAGTG-Z0407	lane1-s036-index-TCTAGCGTAGTG-Z0407	NC1-4	7	Unexposed	F	458	28	0	0	0	0	0	0	0	2.086	1	0	7_Unexposed
lane1-s037-index-TCGAGGACTGCA-Z0408	lane1-s037-index-TCGAGGACTGCA-Z0408	NC1-5	7	Unexposed	M	218	25	0	0	0	0	0	0	0	1.395	1	0	7_Unexposed
lane1-s038-index-CGGAGCTATGGT-Z0409	lane1-s038-index-CGGAGCTATGGT-Z0409	NC2-1	7	Unexposed	M	238	25	0	0	0	0	0	0	0	1.523	2	0	7_Unexposed
lane1-s039-index-AAGAGATGTCGA-Z0410	lane1-s039-index-AAGAGATGTCGA-Z0410	NC2-2	7	Unexposed	M	255	26	0	0	0	0	0	0	0	1.451	2	0	7_Unexposed
lane1-s040-index-TCCAAAGTGTTC-Z0411	lane1-s040-index-TCCAAAGTGTTC-Z0411	NC2-3	7	Unexposed	F	266	25	0	0	0	0	0	0	0	1.702	2	0	7_Unexposed
lane1-s041-index-TACAGATGGCTC-Z0412	lane1-s041-index-TACAGATGGCTC-Z0412	NC2-4	7	Unexposed	F	279	25.5	0	0	0	0	0	0	0	1.683	2	0	7_Unexposed
lane1-s042-index-ACGTGTACCCAA-Z0413	lane1-s042-index-ACGTGTACCCAA-Z0413	NC2-5	7	Unexposed	F	305	26	0	0	0	0	0	0	0	1.735	2	0	7_Unexposed
lane1-s043-index-AAGGAGCGCCTT-Z0414	lane1-s043-index-AAGGAGCGCCTT-Z0414	NC3-1	7	Unexposed	F	255	24.5	0	0	0	0	0	0	0	1.734	3	0	7_Unexposed
lane1-s045-index-GTCTAATTCCGA-Z0415	lane1-s045-index-GTCTAATTCCGA-Z0415	NC3-2	7	Unexposed	M	283	26	0	0	0	0	0	0	0	1.61	3	0	7_Unexposed
lane1-s046-index-TCCGAATTCACA-Z0416	lane1-s046-index-TCCGAATTCACA-Z0416	NC3-3	7	Unexposed	F	326	26.5	0	0	0	0	0	0	0	1.752	3	0	7_Unexposed
lane1-s047-index-ACGCCACGAATG-Z0417	lane1-s047-index-ACGCCACGAATG-Z0417	NC3-4	7	Unexposed	F	440	27.5	0	0	0	0	0	0	0	2.116	3	0	7_Unexposed
lane1-s048-index-GGCCACGTAGTA-Z0418	lane1-s048-index-GGCCACGTAGTA-Z0418	NC3-5	7	Unexposed	F	295	25	0	0	0	0	0	0	0	1.888	3	0	7_Unexposed
lane1-s049-index-TAGGAACTGGCC-Z0419	lane1-s049-index-TAGGAACTGGCC-Z0419	PC1-1	7	Exposed	F	168	22.5	6	0	6	0	7	1	0	1.475	4	1	7_Exposed
lane1-s050-index-CTAGCGAACATC-Z0420	lane1-s050-index-CTAGCGAACATC-Z0420	PC1-2	7	Exposed	F	282	26	2	0	2	0	36	1	0	1.604	4	1	7_Exposed
lane1-s051-index-GACAGGAGATAG-Z0421	lane1-s051-index-GACAGGAGATAG-Z0421	PC1-3	7	Exposed	M	180	23	0	0	0	0	2	1	0	1.479	4	1	7_Exposed
lane1-s052-index-ATTCCTGTGAGT-Z0422	lane1-s052-index-ATTCCTGTGAGT-Z0422	PC1-4	7	Exposed	M	190	24	0	0	0	0	0	0	0	1.374	4	0	7_Exposed
lane1-s053-index-GAGGCTCATCAT-Z0423	lane1-s053-index-GAGGCTCATCAT-Z0423	PC1-5	7	Exposed	F	352	26.5	0	0	0	0	4	0	0	1.891	4	0	7_Exposed
lane1-s054-index-TCCTCTGTCGAC-Z0424	lane1-s054-index-TCCTCTGTCGAC-Z0424	PC2-1	7	Exposed	F	379	26.5	1	0	1	0	2	0	0	2.037	5	0	7_Exposed
lane1-s055-index-CTATTTGCGACA-Z0425	lane1-s055-index-CTATTTGCGACA-Z0425	PC2-2	7	Exposed	F	376	27	0	0	0	0	0	0	0	1.91	5	0	7_Exposed
lane1-s056-index-AGTAGAGGGATG-Z0426	lane1-s056-index-AGTAGAGGGATG-Z0426	PC2-3	7	Exposed	F	235	25	0	0	0	0	0	0	0	1.504	5	0	7_Exposed
lane1-s057-index-CGCAGCGGTATA-Z0427	lane1-s057-index-CGCAGCGGTATA-Z0427	PC2-4	7	Exposed	M	286	26.5	0	0	0	0	4	1	0	1.537	5	1	7_Exposed
lane1-s058-index-AATGCCTCAACT-Z0428	lane1-s058-index-AATGCCTCAACT-Z0428	PC2-5	7	Exposed	F	314	27	1	0	1	0	4	1	0	1.595	5	1	7_Exposed
lane1-s059-index-GGTGTCTATTGT-Z0429	lane1-s059-index-GGTGTCTATTGT-Z0429	PC3-1	7	Exposed	F	299	26	1	0	1	0	0	0	0	1.701	6	0	7_Exposed
lane1-s060-index-GTCAATTGACCG-Z0430	lane1-s060-index-GTCAATTGACCG-Z0430	PC3-2	7	Exposed	F	406	27	0	0	0	0	0	0	0	2.063	6	0	7_Exposed
lane1-s061-index-CAACACGCACGA-Z0431	lane1-s061-index-CAACACGCACGA-Z0431	PC3-3	7	Exposed	M	193	24	0	0	0	0	2	0	0	1.396	6	0	7_Exposed
lane1-s062-index-CCATGCGATAAC-Z0432	lane1-s062-index-CCATGCGATAAC-Z0432	PC3-4	7	Exposed	F	307	27	5	0	5	0	9	1	0	1.56	6	1	7_Exposed
lane1-s063-index-CCTCTCGTGATC-Z0433	lane1-s063-index-CCTCTCGTGATC-Z0433	PC3-5	7	Exposed	M	242	26	1	0	1	0	2	2	0	1.377	6	2	7_Exposed
lane1-s064-index-GCCTGAATTTAC-Z0434	lane1-s064-index-GCCTGAATTTAC-Z0434	NC1-6	10	Unexposed	F	416	29	0	0	0	0	0	0	0	1.706	1	0	10_Unexposed
lane1-s065-index-GTCCGAAACACT-Z0435	lane1-s065-index-GTCCGAAACACT-Z0435	NC1-7	10	Unexposed	F	256	26.5	0	0	0	0	0	0	0	1.376	1	0	10_Unexposed
lane1-s066-index-TAAACCGCGTGT-Z0436	lane1-s066-index-TAAACCGCGTGT-Z0436	NC1-8	10	Unexposed	M	235	26	0	0	0	0	0	0	0	1.337	1	0	10_Unexposed
lane1-s067-index-CTAGATTTGCCA-Z0437	lane1-s067-index-CTAGATTTGCCA-Z0437	NC1-9	10	Unexposed	F	388	27.5	0	0	0	0	0	0	0	1.866	1	0	10_Unexposed
lane1-s068-index-TAAGGTAAGGTG-Z0438	lane1-s068-index-TAAGGTAAGGTG-Z0438	NC1-10	10	Unexposed	F	357	28	0	0	0	0	0	0	0	1.626	1	0	10_Unexposed
lane1-s069-index-CAGGAAGGTTAA-Z0439	lane1-s069-index-CAGGAAGGTTAA-Z0439	NC2-6	10	Unexposed	F	328	26	0	0	0	0	0	0	0	1.866	2	0	10_Unexposed
lane1-s070-index-TGGCATACGGCA-Z0440	lane1-s070-index-TGGCATACGGCA-Z0440	NC2-7	10	Unexposed	F	264	25	0	0	0	0	0	0	0	1.69	2	0	10_Unexposed
lane1-s071-index-ACTATTGTCACG-Z0441	lane1-s071-index-ACTATTGTCACG-Z0441	NC2-8	10	Unexposed	F	328	26.5	0	0	0	0	0	0	0	1.763	2	0	10_Unexposed
lane1-s072-index-CGAGTTGTAGCG-Z0442	lane1-s072-index-CGAGTTGTAGCG-Z0442	NC2-9	10	Unexposed	F	367	26	0	0	0	0	0	0	0	2.088	2	0	10_Unexposed
lane1-s073-index-CGACTGTCTTAA-Z0443	lane1-s073-index-CGACTGTCTTAA-Z0443	NC2-10	10	Unexposed	F	345	25	0	0	0	0	0	0	0	2.208	2	0	10_Unexposed
lane1-s074-index-GCTCAGTGCAGA-Z0444	lane1-s074-index-GCTCAGTGCAGA-Z0444	NC3-6	10	Unexposed	F	335	26	0	0	0	0	0	0	0	1.906	3	0	10_Unexposed
lane1-s075-index-TACTAATCTGCG-Z0445	lane1-s075-index-TACTAATCTGCG-Z0445	NC3-7	10	Unexposed	M	231	25	0	0	0	0	0	0	0	1.478	3	0	10_Unexposed
lane1-s076-index-ATGTGGGACCCA-Z0446	lane1-s076-index-ATGTGGGACCCA-Z0446	NC3-8	10	Unexposed	F	363	27	0	0	0	0	0	0	0	1.844	3	0	10_Unexposed
lane1-s077-index-TATGCACCAGTG-Z0447	lane1-s077-index-TATGCACCAGTG-Z0447	NC3-9	10	Unexposed	F	394	27	0	0	0	0	0	0	0	2.002	3	0	10_Unexposed
lane1-s078-index-AGAGCCTACGTT-Z0448	lane1-s078-index-AGAGCCTACGTT-Z0448	NC3-10	10	Unexposed	F	334	25	0	0	0	0	0	0	0	2.138	3	0	10_Unexposed
lane1-s079-index-CGGACTACAACT-Z0449	lane1-s079-index-CGGACTACAACT-Z0449	PC1-6	10	Exposed	M	227	25	6	0	6	0	3	1	0	1.453	4	1	10_Exposed
lane1-s080-index-CGGGTTTGACGA-Z0450	lane1-s080-index-CGGGTTTGACGA-Z0450	PC1-7	10	Exposed	F	243	24.5	7	0	7	0	0	1	0	1.652	4	1	10_Exposed
lane1-s081-index-TGGCACCGATTA-Z0451	lane1-s081-index-TGGCACCGATTA-Z0451	PC1-8	10	Exposed	F	382	28	0	0	0	0	2	1	0	1.74	4	1	10_Exposed
lane1-s082-index-CTACCGGATCAA-Z0452	lane1-s082-index-CTACCGGATCAA-Z0452	PC1-9	10	Exposed	M	297	26.5	0	0	0	0	0	0	0	1.596	4	0	10_Exposed
lane1-s083-index-AGCAAACACCCG-Z0453	lane1-s083-index-AGCAAACACCCG-Z0453	PC1-10	10	Exposed	M	265	25	1	0	1	0	0	1	0	1.696	4	1	10_Exposed
lane1-s084-index-AACCGCGGTCAA-Z0454	lane1-s084-index-AACCGCGGTCAA-Z0454	PC2-6	10	Exposed	F	302	26.5	25	0	25	0	13	1	1	1.623	5	2	10_Exposed
lane1-s085-index-GATTGGTTGCAC-Z0455	lane1-s085-index-GATTGGTTGCAC-Z0455	PC2-7	10	Exposed	F	260	25	2	0	2	0	9	2	1	1.664	5	3	10_Exposed
lane1-s086-index-TCAAGCTCAAGC-Z0456	lane1-s086-index-TCAAGCTCAAGC-Z0456	PC2-8	10	Exposed	F	253	25	8	0	8	0	0	1	1	1.619	5	2	10_Exposed
lane1-s087-index-TAATCCACAGCG-Z0457	lane1-s087-index-TAATCCACAGCG-Z0457	PC2-9	10	Exposed	F	263	25	0	0	0	0	0	0	0	1.683	5	0	10_Exposed
lane1-s088-index-GGTCACTGACAG-Z0458	lane1-s088-index-GGTCACTGACAG-Z0458	PC2-10	10	Exposed	F	306	27	3	0	3	0	3	0	0	1.555	5	0	10_Exposed
lane1-s089-index-GACTCGAATCGT-Z0459	lane1-s089-index-GACTCGAATCGT-Z0459	PC3-6	10	Exposed	M	257	25	0	0	0	0	4	0	0	1.645	6	0	10_Exposed
lane1-s090-index-ATGGACCGAACC-Z0460	lane1-s090-index-ATGGACCGAACC-Z0460	PC3-7	10	Exposed	F	512	29	2	0	2	0	0	1	0	2.099	6	1	10_Exposed
lane1-s091-index-AAGATGGATCAG-Z0461	lane1-s091-index-AAGATGGATCAG-Z0461	PC3-8	10	Exposed	F	224	25.5	0	0	0	0	0	0	0	1.351	6	0	10_Exposed
lane1-s092-index-AGCCGGCACATA-Z0462	lane1-s092-index-AGCCGGCACATA-Z0462	PC3-9	10	Exposed	F	345	25	2	0	2	0	2	1	0	2.208	6	1	10_Exposed
lane1-s093-index-ACGATGCGACCA-Z0463	lane1-s093-index-ACGATGCGACCA-Z0463	PC3-10	10	Exposed	F	314	25.5	4	0	4	0	1	0	0	1.894	6	0	10_Exposed
lane1-s094-index-CCAAGTCTTACA-Z0464	lane1-s094-index-CCAAGTCTTACA-Z0464	NC1-11	21	Unexposed	M	272	26	0	0	0	0	0	0	0	1.548	1	0	21_Unexposed
lane1-s095-index-ACACTAGATCCG-Z0465	lane1-s095-index-ACACTAGATCCG-Z0465	NC1-12	21	Unexposed	M	307	26	0	0	0	0	0	0	0	1.747	1	0	21_Unexposed
lane1-s096-index-GCTCGAAGATCG-Z0466	lane1-s096-index-GCTCGAAGATCG-Z0466	NC1-13	21	Unexposed	F	344	27	0	0	0	0	0	0	0	1.748	1	0	21_Unexposed
lane1-s097-index-CGCAAATTCGAC-Z0467	lane1-s097-index-CGCAAATTCGAC-Z0467	NC1-14	21	Unexposed	F	356	27.5	0	0	0	0	0	0	0	1.712	1	0	21_Unexposed
lane1-s098-index-TAACTCTGATGC-Z0468	lane1-s098-index-TAACTCTGATGC-Z0468	NC1-15	21	Unexposed	F	417	28.5	0	0	0	0	0	0	0	1.801	1	0	21_Unexposed
lane1-s099-index-TACGATGACCAC-Z0469	lane1-s099-index-TACGATGACCAC-Z0469	NC2-11	21	Unexposed	F	318	26.5	0	0	0	0	0	0	0	1.709	2	0	21_Unexposed
lane1-s100-index-TTCGCCCTTCAG-Z0470	lane1-s100-index-TTCGCCCTTCAG-Z0470	NC2-12	21	Unexposed	F	232	23	0	0	0	0	0	0	0	1.907	2	0	21_Unexposed
lane1-s101-index-ATTCTGTGAGCG-Z0471	lane1-s101-index-ATTCTGTGAGCG-Z0471	NC2-13	21	Unexposed	F	241	25	0	0	0	0	0	0	0	1.542	2	0	21_Unexposed
lane1-s102-index-GCACTACCGAAT-Z0472	lane1-s102-index-GCACTACCGAAT-Z0472	NC2-14	21	Unexposed	M	238	25.5	0	0	0	0	0	0	0	1.435	2	0	21_Unexposed
lane1-s103-index-GGTAACAGCTCG-Z0473	lane1-s103-index-GGTAACAGCTCG-Z0473	NC2-15	21	Unexposed	F	372	26.5	0	0	0	0	0	0	0	1.999	2	0	21_Unexposed
lane1-s104-index-CAGCATGTGTTG-Z0474	lane1-s104-index-CAGCATGTGTTG-Z0474	NC3-11	21	Unexposed	F	330	25	0	0	0	0	0	0	0	2.112	3	0	21_Unexposed
lane1-s105-index-ACGTGAGAGAAT-Z0475	lane1-s105-index-ACGTGAGAGAAT-Z0475	NC3-12	21	Unexposed	F	260	25	0	0	0	0	0	0	0	1.664	3	0	21_Unexposed
lane1-s106-index-CGTTTAGAGTCG-Z0476	lane1-s106-index-CGTTTAGAGTCG-Z0476	NC3-13	21	Unexposed	F	290	27	0	0	0	0	0	0	0	1.473	3	0	21_Unexposed
lane1-s107-index-CTTGCTGAAGAC-Z0477	lane1-s107-index-CTTGCTGAAGAC-Z0477	NC3-14	21	Unexposed	F	303	26.5	0	0	0	0	0	0	0	1.628	3	0	21_Unexposed
lane1-s108-index-GGAGGTTATCCG-Z0478	lane1-s108-index-GGAGGTTATCCG-Z0478	NC3-15	21	Unexposed	M	354	27	0	0	0	0	0	0	0	1.799	3	0	21_Unexposed
lane1-s109-index-TAAAGTCACCCT-Z0479	lane1-s109-index-TAAAGTCACCCT-Z0479	PC1-11	21	Exposed	F	342	26.5	22	0	22	0	4	0	0	1.838	4	0	21_Exposed
lane1-s110-index-TCGCATGAAGTC-Z0480	lane1-s110-index-TCGCATGAAGTC-Z0480	PC1-12	21	Exposed	F	229	24.5	2	0	2	0	0	1	0	1.557	4	1	21_Exposed
lane1-s111-index-TTGCAGACAGGC-Z0481	lane1-s111-index-TTGCAGACAGGC-Z0481	PC1-13	21	Exposed	F	343	28	0	0	0	0	0	0	0	1.563	4	0	21_Exposed
lane1-s112-index-GAGGCCATCAGT-Z0482	lane1-s112-index-GAGGCCATCAGT-Z0482	PC1-14	21	Exposed	F	265	28.5	5	0	5	0	2	1	0	1.145	4	1	21_Exposed
lane1-s113-index-TGCGGCATCGAA-Z0483	lane1-s113-index-TGCGGCATCGAA-Z0483	PC1-15	21	Exposed	M	323	26	0	0	0	0	1	0	0	1.838	4	0	21_Exposed
lane1-s114-index-ACACGAGCCACA-Z0484	lane1-s114-index-ACACGAGCCACA-Z0484	PC2-11	21	Exposed	M	209	25	18	0	18	0	4	3	2	1.338	5	5	21_Exposed
lane1-s115-index-CTCCTGAAAGTT-Z0485	lane1-s115-index-CTCCTGAAAGTT-Z0485	PC2-12	21	Exposed	M	95	17.5	4	0	4	0	0	1	0	1.773	5	1	21_Exposed
lane1-s117-index-TGGACACCGAAC-Z0486	lane1-s117-index-TGGACACCGAAC-Z0486	PC2-13	21	Exposed	F	299	26	2	0	2	0	2	3	1	1.701	5	4	21_Exposed
lane1-s118-index-GATAGCTGTCTT-Z0487	lane1-s118-index-GATAGCTGTCTT-Z0487	PC2-14	21	Exposed	F	305	25.5	0	0	0	0	0	2	0	1.839	5	2	21_Exposed
lane1-s119-index-TGACCGGTCAAT-Z0488	lane1-s119-index-TGACCGGTCAAT-Z0488	PC2-15	21	Exposed	F	225	24	0	0	0	0	0	1	0	1.628	5	1	21_Exposed
lane1-s120-index-TGTGATGGAGAA-Z0490	lane1-s120-index-TGTGATGGAGAA-Z0490	PC3-11	21	Exposed	F	320	27	1	0	1	0	0	0	1	1.626	6	1	21_Exposed
lane1-s121-index-CCTCTACCTACG-Z0491	lane1-s121-index-CCTCTACCTACG-Z0491	PC3-12	21	Exposed	F	313	25	6	0	6	0	13	1	1	2.003	6	2	21_Exposed
lane1-s122-index-GTCGTCCTAAAT-Z0492	lane1-s122-index-GTCGTCCTAAAT-Z0492	PC3-13	21	Exposed	F	288	26	2	0	2	0	1	1	1	1.639	6	2	21_Exposed
lane1-s123-index-CCTTGGCTATCC-Z0493	lane1-s123-index-CCTTGGCTATCC-Z0493	PC3-14	21	Exposed	F	387	28	12	0	12	0	1	1	1	1.763	6	2	21_Exposed
lane1-s124-index-CGTAACCAACCA-Z0494	lane1-s124-index-CGTAACCAACCA-Z0494	PC3-15	21	Exposed	M	195	24.5	20	0	20	0	6	2	2	1.326	6	4	21_Exposed
lane1-s125-index-CATTTGGACGAC-Z0495	lane1-s125-index-CATTTGGACGAC-Z0495	NC1-16	30	Unexposed	F	281	26	0	0	0	0	0	0	0	1.599	1	0	30_Unexposed
lane1-s126-index-TGGAGCACGTTG-Z0496	lane1-s126-index-TGGAGCACGTTG-Z0496	NC1-17	30	Unexposed	F	502	30	0	0	0	0	0	0	0	1.859	1	0	30_Unexposed
lane1-s127-index-GCGACTTGTGTA-Z0497	lane1-s127-index-GCGACTTGTGTA-Z0497	NC1-18	30	Unexposed	F	263	24	0	0	0	0	0	0	0	1.902	1	0	30_Unexposed
lane1-s128-index-ATTCATGGACGC-Z0498	lane1-s128-index-ATTCATGGACGC-Z0498	NC1-19	30	Unexposed	M	275	24.5	0	0	0	0	0	0	0	1.87	1	0	30_Unexposed
lane1-s129-index-GTTACGCATTAC-Z0499	lane1-s129-index-GTTACGCATTAC-Z0499	NC1-20	30	Unexposed	F	378	26.5	0	0	0	0	0	0	0	2.031	1	0	30_Unexposed
lane1-s130-index-ATGTACGGCGAC-Z0500	lane1-s130-index-ATGTACGGCGAC-Z0500	NC2-16	30	Unexposed	F	307	26	0	0	0	0	0	0	0	1.747	2	0	30_Unexposed
lane1-s131-index-TAATCGGATTCC-Z0501	lane1-s131-index-TAATCGGATTCC-Z0501	NC2-17	30	Unexposed	F	267	25	0	0	0	0	0	0	0	1.709	2	0	30_Unexposed
lane1-s132-index-AACCATCGGGTG-Z0502	lane1-s132-index-AACCATCGGGTG-Z0502	NC2-18	30	Unexposed	F	422	27.5	0	0	0	0	0	0	0	2.029	2	0	30_Unexposed
lane1-s133-index-TACCTCTCAGAA-Z0503	lane1-s133-index-TACCTCTCAGAA-Z0503	NC2-19	30	Unexposed	M	277	26	0	0	0	0	0	0	0	1.576	2	0	30_Unexposed
lane1-s134-index-TTCCGTAGGGAT-Z0504	lane1-s134-index-TTCCGTAGGGAT-Z0504	NC2-20	30	Unexposed	F	424	29	0	0	0	0	0	0	0	1.738	2	0	30_Unexposed
lane1-s135-index-CCTAATGGAACC-Z0505	lane1-s135-index-CCTAATGGAACC-Z0505	NC3-16	30	Unexposed	F	361	27	0	0	0	0	0	0	0	1.834	3	0	30_Unexposed
lane1-s136-index-TTCTGGGAACAC-Z0506	lane1-s136-index-TTCTGGGAACAC-Z0506	NC3-17	30	Unexposed	M	251	25	0	0	0	0	0	0	0	1.606	3	0	30_Unexposed
lane1-s137-index-ATTATACCTCGG-Z0507	lane1-s137-index-ATTATACCTCGG-Z0507	NC3-18	30	Unexposed	F	279	26	0	0	0	0	0	0	0	1.587	3	0	30_Unexposed
lane1-s138-index-GCTAATTACGCT-Z0508	lane1-s138-index-GCTAATTACGCT-Z0508	NC3-19	30	Unexposed	M	339	28.5	0	0	0	0	0	0	0	1.464	3	0	30_Unexposed
lane1-s139-index-GTCATTCACGAG-Z0509	lane1-s139-index-GTCATTCACGAG-Z0509	NC3-20	30	Unexposed	F	277	26	0	0	0	0	0	0	0	1.576	3	0	30_Unexposed
lane1-s140-index-TAGAACTCACCT-Z0510	lane1-s140-index-TAGAACTCACCT-Z0510	PC1-16	30	Exposed	F	276	26	4	1	0	0	2	0	1	1.57	4	1	30_Exposed
lane1-s141-index-AGATAGGACAGG-Z0511	lane1-s141-index-AGATAGGACAGG-Z0511	PC1-17	30	Exposed	F	269	25.5	11	1	10	0	4	1	2	1.622	4	3	30_Exposed
lane1-s142-index-GCGTGTTAAACC-Z0512	lane1-s142-index-GCGTGTTAAACC-Z0512	PC1-18	30	Exposed	F	188	24	32	0	32	0	11	2	2	1.36	4	4	30_Exposed
lane1-s143-index-CTCCTACTGTCT-Z0513	lane1-s143-index-CTCCTACTGTCT-Z0513	PC1-19	30	Exposed	F	240	24	9	4	5	0	12	2	3	1.736	4	5	30_Exposed
lane1-s144-index-GTAAGTCGTGGC-Z0514	lane1-s144-index-GTAAGTCGTGGC-Z0514	PC1-20	30	Exposed	F	228	25	11	0	11	0	6	1	1	1.459	4	2	30_Exposed
lane1-s145-index-GGTAGGAACAAT-Z0515	lane1-s145-index-GGTAGGAACAAT-Z0515	PC2-16	30	Exposed	M	273	26	5	0	5	0	0	0	1	1.553	5	1	30_Exposed
lane1-s146-index-CAAGTTTACGGC-Z0516	lane1-s146-index-CAAGTTTACGGC-Z0516	PC2-17	30	Exposed	F	293	27	12	0	12	0	5	3	3	1.489	5	6	30_Exposed
lane1-s147-index-CTGGAAATCTGC-Z0517	lane1-s147-index-CTGGAAATCTGC-Z0517	PC2-18	30	Exposed	F	189	25	7	0	7	0	3	3	2	1.21	5	5	30_Exposed
lane1-s148-index-GACTGATCATCT-Z0518	lane1-s148-index-GACTGATCATCT-Z0518	PC2-19	30	Exposed	F	364	27.5	3	0	3	0	0	1	1	1.75	5	2	30_Exposed
lane1-s149-index-AGAACACGTCTC-Z0519	lane1-s149-index-AGAACACGTCTC-Z0519	PC2-20	30	Exposed	M	230	26.5	6	3	3	0	7	0	1	1.236	5	1	30_Exposed
lane1-s150-index-GTGCCGGTGATA-Z0520	lane1-s150-index-GTGCCGGTGATA-Z0520	PC3-16	30	Exposed	F	530	29.5	0	0	0	0	0	0	0	2.064	6	0	30_Exposed
lane1-s151-index-ATCTCTGGCATA-Z0521	lane1-s151-index-ATCTCTGGCATA-Z0521	PC3-17	30	Exposed	F	340	27	0	0	0	0	0	0	0	1.727	6	0	30_Exposed
lane1-s152-index-TGATTTGGACCT-Z0522	lane1-s152-index-TGATTTGGACCT-Z0522	PC3-18	30	Exposed	F	357	39	3	0	3	0	0	0	0	0.602	6	0	30_Exposed
lane1-s153-index-TGTGAGCACGGT-Z0523	lane1-s153-index-TGTGAGCACGGT-Z0523	PC3-19	30	Exposed	F	396	27.5	1	0	1	0	0	0	0	1.904	6	0	30_Exposed
lane1-s154-index-ACACAAAGGGAG-Z0524	lane1-s154-index-ACACAAAGGGAG-Z0524	PC3-20	30	Exposed	M	168	22.5	4	0	4	0	4	2	0	1.475	6	2	30_Exposed
lane1-s155-index-TTAGGTGCAGCT-Z0525	lane1-s155-index-TTAGGTGCAGCT-Z0525	NC1-21	43	Unexposed	M	364	27.5	0	0	0	0	0	0	0	1.75	1	0	43_Unexposed
lane1-s156-index-CATCGGTCAAGG-Z0526	lane1-s156-index-CATCGGTCAAGG-Z0526	NC1-22	43	Unexposed	M	311	26	0	0	0	0	0	0	0	1.769	1	0	43_Unexposed
lane1-s157-index-TGAGGATGATAG-Z0527	lane1-s157-index-TGAGGATGATAG-Z0527	NC1-23	43	Unexposed	M	232	25	0	0	0	0	0	0	0	1.485	1	0	43_Unexposed
lane1-s159-index-TAAGGCCTATCG-Z0529	lane1-s159-index-TAAGGCCTATCG-Z0529	NC1-25	43	Unexposed	F	276	26.5	0	0	0	0	0	0	0	1.483	1	0	43_Unexposed
lane1-s160-index-CACGAGGTCATT-Z0530	lane1-s160-index-CACGAGGTCATT-Z0530	NC2-21	43	Unexposed	F	240	25	0	0	0	0	0	0	0	1.536	2	0	43_Unexposed
lane1-s161-index-CACATGCCTAAG-Z0531	lane1-s161-index-CACATGCCTAAG-Z0531	NC2-22	43	Unexposed	F	288	26	0	0	0	0	0	0	0	1.639	2	0	43_Unexposed
lane1-s162-index-TGCTATATCTGG-Z0532	lane1-s162-index-TGCTATATCTGG-Z0532	NC2-23	43	Unexposed	F	272	26	0	0	0	0	0	0	0	1.548	2	0	43_Unexposed
lane1-s163-index-AAGTGGACTCTC-Z0533	lane1-s163-index-AAGTGGACTCTC-Z0533	NC2-24	43	Unexposed	F	254	25	0	0	0	0	0	0	0	1.626	2	0	43_Unexposed
lane1-s164-index-TACGTCCCGTTC-Z0534	lane1-s164-index-TACGTCCCGTTC-Z0534	NC2-25	43	Unexposed	M	285	28	0	0	0	0	0	0	0	1.298	2	0	43_Unexposed
lane1-s165-index-AAGCCTACACGT-Z0535	lane1-s165-index-AAGCCTACACGT-Z0535	NC3-21	43	Unexposed	M	247	25	0	0	0	0	0	0	0	1.581	3	0	43_Unexposed
lane1-s166-index-CTGTAGGAGACC-Z0536	lane1-s166-index-CTGTAGGAGACC-Z0536	NC3-22	43	Unexposed	M	252	26	0	0	0	0	0	0	0	1.434	3	0	43_Unexposed
lane1-s167-index-CCTTAAGTCAGT-Z0537	lane1-s167-index-CCTTAAGTCAGT-Z0537	NC3-23	43	Unexposed	M	329	26	0	0	0	0	0	0	0	1.872	3	0	43_Unexposed
lane1-s168-index-AACGGCAGCATC-Z0538	lane1-s168-index-AACGGCAGCATC-Z0538	NC3-24	43	Unexposed	F	249	25	0	0	0	0	0	0	0	1.594	3	0	43_Unexposed
lane1-s169-index-CTGGCCTAGGAA-Z0539	lane1-s169-index-CTGGCCTAGGAA-Z0539	NC3-25	43	Unexposed	F	268	25	0	0	0	0	0	0	0	1.715	3	0	43_Unexposed
lane1-s170-index-TCCAGGCTTAAT-Z0540	lane1-s170-index-TCCAGGCTTAAT-Z0540	PC1-21	43	Exposed	F	329	27	3	1	2	0	0	1	1	1.671	4	2	43_Exposed
lane1-s171-index-GATAGAAAGCCA-Z0541	lane1-s171-index-GATAGAAAGCCA-Z0541	PC1-22	43	Exposed	F	430	27	15	0	15	0	4	1	3	2.185	4	4	43_Exposed
lane1-s172-index-TGTTTGAGCTGT-Z0542	lane1-s172-index-TGTTTGAGCTGT-Z0542	PC1-23	43	Exposed	M	211	24	13	1	12	0	4	3	3	1.526	4	6	43_Exposed
lane1-s173-index-ATGGATACGCTC-Z0543	lane1-s173-index-ATGGATACGCTC-Z0543	PC1-24	43	Exposed	F	171	24	18	5	13	0	13	3	2	1.237	4	5	43_Exposed
lane1-s174-index-CCATTCGCCCAT-Z0544	lane1-s174-index-CCATTCGCCCAT-Z0544	PC1-25	43	Exposed	F	218	29	27	0	27	0	25	2	3	0.894	4	5	43_Exposed
lane1-s175-index-TACCCAGAGATC-Z0545	lane1-s175-index-TACCCAGAGATC-Z0545	PC2-21	43	Exposed	F	260	26	0	0	0	0	0	0	1	1.479	5	1	43_Exposed
lane1-s176-index-ACCCGTATGATG-Z0546	lane1-s176-index-ACCCGTATGATG-Z0546	PC2-22	43	Exposed	M	236	27	6	1	5	0	13	2	2	1.199	5	4	43_Exposed
lane1-s177-index-CCATAATCCGTA-Z0547	lane1-s177-index-CCATAATCCGTA-Z0547	PC2-23	43	Exposed	M	185	25	3	0	3	0	0	2	0	1.184	5	2	43_Exposed
lane1-s178-index-TGAGTTCGCTAT-Z0548	lane1-s178-index-TGAGTTCGCTAT-Z0548	PC2-24	43	Exposed	M	175	25	25	0	25	0	10	3	2	1.12	5	5	43_Exposed
lane1-s179-index-CACACAGCGTTA-Z0549	lane1-s179-index-CACACAGCGTTA-Z0549	PC2-25	43	Exposed	M	296	28	3	0	3	0	0	0	1	1.348	5	1	43_Exposed
lane1-s180-index-TCGAGTTTGGTT-Z0550	lane1-s180-index-TCGAGTTTGGTT-Z0550	PC3-21	43	Exposed	F	401	29	2	1	1	0	7	1	2	1.644	6	3	43_Exposed
lane1-s181-index-TTACGAGACGGC-Z0551	lane1-s181-index-TTACGAGACGGC-Z0551	PC3-22	43	Exposed	F	221	25.5	1	0	1	0	2	1	2	1.333	6	3	43_Exposed
lane1-s182-index-CGAGATACCCAG-Z0552	lane1-s182-index-CGAGATACCCAG-Z0552	PC3-23	43	Exposed	M	274	26	1	0	1	0	1	1	1	1.559	6	2	43_Exposed
lane1-s183-index-CAACGGGTAGTC-Z0553	lane1-s183-index-CAACGGGTAGTC-Z0553	PC3-24	43	Exposed	F	208	26	15	3	12	0	11	3	3	1.183	6	6	43_Exposed
lane1-s184-index-AGTTTGCAACGC-Z0554	lane1-s184-index-AGTTTGCAACGC-Z0554	PC3-25	43	Exposed	F	154	24	4	0	4	0	2	1	1	1.114	6	2	43_Exposed
lane1-s185-index-ACTTATGCGGTT-Z0555	lane1-s185-index-ACTTATGCGGTT-Z0555	NC1-26	59	Unexposed	F	470	30	0	0	0	0	0	0	0	1.741	1	0	59_Unexposed
lane1-s186-index-AAGGTGTAAGGT-Z0556	lane1-s186-index-AAGGTGTAAGGT-Z0556	NC1-27	59	Unexposed	F	259	26	0	0	0	0	0	0	0	1.474	1	0	59_Unexposed
lane1-s187-index-GTAAGCACCTAC-Z0557	lane1-s187-index-GTAAGCACCTAC-Z0557	NC1-28	59	Unexposed	F	406	28	0	0	0	0	0	0	0	1.849	1	0	59_Unexposed
lane1-s188-index-CATCCAAATGCG-Z0558	lane1-s188-index-CATCCAAATGCG-Z0558	NC1-29	59	Unexposed	M	306	26.5	0	0	0	0	0	0	0	1.644	1	0	59_Unexposed
lane1-s189-index-CGCACATGTTAT-Z0559	lane1-s189-index-CGCACATGTTAT-Z0559	NC1-30	59	Unexposed	M	258	25.5	0	0	0	0	0	0	0	1.556	1	0	59_Unexposed
lane1-s190-index-CGATTTCTCAAG-Z0560	lane1-s190-index-CGATTTCTCAAG-Z0560	NC2-26	59	Unexposed	F	336	27	0	0	0	0	0	0	0	1.707	2	0	59_Unexposed
lane1-s191-index-TGTGCTGTGTAG-Z0561	lane1-s191-index-TGTGCTGTGTAG-Z0561	NC2-27	59	Unexposed	F	326	27.5	0	0	0	0	0	0	0	1.568	2	0	59_Unexposed
lane1-s192-index-ACGTAGCATTTC-Z0562	lane1-s192-index-ACGTAGCATTTC-Z0562	NC2-28	59	Unexposed	M	266	27	0	0	0	0	0	0	0	1.351	2	0	59_Unexposed
lane1-s193-index-GGCAACCTCAGA-Z0563	lane1-s193-index-GGCAACCTCAGA-Z0563	NC2-29	59	Unexposed	M	361	29	0	0	0	0	0	0	0	1.48	2	0	59_Unexposed
lane1-s194-index-GAGAGAATGATC-Z0564	lane1-s194-index-GAGAGAATGATC-Z0564	NC2-30	59	Unexposed	F	490	29	0	0	0	0	0	0	0	2.009	2	0	59_Unexposed
lane1-s195-index-TACGGTATGTCT-Z0565	lane1-s195-index-TACGGTATGTCT-Z0565	NC3-26	59	Unexposed	F	369	27	0	0	0	0	0	0	0	1.875	3	0	59_Unexposed
lane1-s196-index-CGCATGAGGATC-Z0566	lane1-s196-index-CGCATGAGGATC-Z0566	NC3-27	59	Unexposed	M	338	27	0	0	0	0	0	0	0	1.717	3	0	59_Unexposed
lane1-s197-index-AGGGACGATAAT-Z0567	lane1-s197-index-AGGGACGATAAT-Z0567	NC3-28	59	Unexposed	F	227	24	0	0	0	0	0	0	0	1.642	3	0	59_Unexposed
lane1-s198-index-ATAGCGGTCTGG-Z0568	lane1-s198-index-ATAGCGGTCTGG-Z0568	NC3-29	59	Unexposed	M	290	27	0	0	0	0	0	0	0	1.473	3	0	59_Unexposed
lane1-s199-index-GTTTCTAGAGCT-Z0569	lane1-s199-index-GTTTCTAGAGCT-Z0569	NC3-30	59	Unexposed	M	272	26.5	0	0	0	0	0	0	0	1.462	3	0	59_Unexposed
lane1-s200-index-CACGTCGATGGA-Z0570	lane1-s200-index-CACGTCGATGGA-Z0570	PC1-26	59	Exposed	M	270	25	1	0	1	0	0	2	1	1.728	4	3	59_Exposed
lane1-s201-index-AACCACACATCG-Z0571	lane1-s201-index-AACCACACATCG-Z0571	PC1-27	59	Exposed	M	185	24.5	10	0	10	0	0	3	3	1.258	4	6	59_Exposed
lane1-s202-index-TCCCAACTTCGC-Z0572	lane1-s202-index-TCCCAACTTCGC-Z0572	PC1-28	59	Exposed	M	141	23	3	0	3	0	0	2	3	1.159	4	5	59_Exposed
lane1-s203-index-AACGCCGAATGC-Z0573	lane1-s203-index-AACGCCGAATGC-Z0573	PC1-29	59	Exposed	M	359	29.5	1	1	0	0	6	3	2	1.398	4	5	59_Exposed
lane1-s204-index-TGCACAATGGCG-Z0574	lane1-s204-index-TGCACAATGGCG-Z0574	PC1-30	59	Exposed	NA	82	22	10	1	6	3	1	3	2	0.77	4	5	59_Exposed
lane1-s205-index-TCTGCAGTTGGA-Z0575	lane1-s205-index-TCTGCAGTTGGA-Z0575	PC2-26	59	Exposed	M	285	28	2	2	0	0	0	1	1	1.298	5	2	59_Exposed
lane1-s206-index-TACGGGTCTTTA-Z0576	lane1-s206-index-TACGGGTCTTTA-Z0576	PC2-27	59	Exposed	F	209	25	1	0	1	0	9	1	1	1.338	5	2	59_Exposed
lane1-s207-index-GGTGAAGATACA-Z0577	lane1-s207-index-GGTGAAGATACA-Z0577	PC2-28	59	Exposed	F	261	25.5	1	1	0	0	2	1	1	1.574	5	2	59_Exposed
lane1-s208-index-GACGAGTCAGTC-Z0578	lane1-s208-index-GACGAGTCAGTC-Z0578	PC2-29	59	Exposed	M	221	25	0	0	0	0	0	3	3	1.414	5	6	59_Exposed
lane1-s209-index-AGCTATCCACGA-Z0579	lane1-s209-index-AGCTATCCACGA-Z0579	PC2-30	59	Exposed	F	192	26	7	3	4	0	9	2	1	1.092	5	3	59_Exposed
lane1-s210-index-AGTTAGTGCGTC-Z0580	lane1-s210-index-AGTTAGTGCGTC-Z0580	PC3-26	59	Exposed	NA	155	24	9	3	6	0	12	3	3	1.121	6	6	59_Exposed
lane1-s211-index-ACGTAAATCGCC-Z0581	lane1-s211-index-ACGTAAATCGCC-Z0581	PC3-27	59	Exposed	F	246	25	0	0	0	0	0	1	0	1.574	6	1	59_Exposed
lane1-s213-index-GGCTGTATGGGT-Z0582	lane1-s213-index-GGCTGTATGGGT-Z0582	PC3-28	59	Exposed	F	251	26	6	1	5	0	4	2	1	1.428	6	3	59_Exposed
lane1-s214-index-ATGCGTAGTGCG-Z0583	lane1-s214-index-ATGCGTAGTGCG-Z0583	PC3-29	59	Exposed	F	282	25	1	0	1	0	0	1	2	1.805	6	3	59_Exposed
lane1-s215-index-TCTTAACGACTG-Z0584	lane1-s215-index-TCTTAACGACTG-Z0584	PC3-30	59	Exposed	M	125	23	9	2	7	0	NA	NA	NA	1.027	6	NA	59_Exposed
lane1-s216-index-AGGCTTTCGTAG-Z0585	lane1-s216-index-AGGCTTTCGTAG-Z0585	NC1-31	86	Unexposed	M	325	26.5	2	0	2	0	0	0	0	1.746	1	0	86_Unexposed
lane1-s217-index-CTCGGCAATTAT-Z0586	lane1-s217-index-CTCGGCAATTAT-Z0586	NC1-32	86	Unexposed	F	280	26	5	0	5	0	0	0	0	1.593	1	0	86_Unexposed
lane1-s218-index-CGATAACATGCC-Z0587	lane1-s218-index-CGATAACATGCC-Z0587	NC1-33	86	Unexposed	F	372	28	0	0	0	0	0	0	0	1.695	1	0	86_Unexposed
lane1-s219-index-CCTACTGTGCCT-Z0588	lane1-s219-index-CCTACTGTGCCT-Z0588	NC1-34	86	Unexposed	F	245	25	0	0	0	0	0	0	0	1.568	1	0	86_Unexposed
lane1-s220-index-GGATGTAAGTAG-Z0589	lane1-s220-index-GGATGTAAGTAG-Z0589	NC1-35	86	Unexposed	F	409	29	0	0	0	0	0	0	0	1.677	1	0	86_Unexposed
lane1-s221-index-TGATCAGAAGAG-Z0590	lane1-s221-index-TGATCAGAAGAG-Z0590	NC2-31	86	Unexposed	M	324	26	0	0	0	0	0	0	0	1.843	2	0	86_Unexposed
lane1-s222-index-CGTGGTTAGCAT-Z0591	lane1-s222-index-CGTGGTTAGCAT-Z0591	NC2-32	86	Unexposed	M	225	23.5	0	0	0	0	0	0	0	1.734	2	0	86_Unexposed
lane1-s223-index-GCCGAGATTGGT-Z0592	lane1-s223-index-GCCGAGATTGGT-Z0592	NC2-33	86	Unexposed	M	224	27	0	0	0	0	0	0	0	1.138	2	0	86_Unexposed
lane1-s224-index-ATGAGACTCCAC-Z0593	lane1-s224-index-ATGAGACTCCAC-Z0593	NC2-34	86	Unexposed	F	293	27	0	0	0	0	0	0	0	1.489	2	0	86_Unexposed
lane1-s225-index-GAATCTTCGAGC-Z0594	lane1-s225-index-GAATCTTCGAGC-Z0594	NC2-35	86	Unexposed	M	306	27	0	0	0	0	0	0	0	1.555	2	0	86_Unexposed
lane1-s226-index-ACACGTAAGCCT-Z0595	lane1-s226-index-ACACGTAAGCCT-Z0595	NC3-31	86	Unexposed	F	401	28	0	0	0	0	0	0	0	1.827	3	0	86_Unexposed
lane1-s227-index-GAGTGGTAGAGA-Z0596	lane1-s227-index-GAGTGGTAGAGA-Z0596	NC3-32	86	Unexposed	F	274	25	0	0	0	0	0	0	0	1.754	3	0	86_Unexposed
lane1-s228-index-GAAGTTGGAAGT-Z0597	lane1-s228-index-GAAGTTGGAAGT-Z0597	NC3-33	86	Unexposed	F	493	29	0	0	0	0	0	0	0	2.021	3	0	86_Unexposed
lane1-s229-index-TTCCTAGGTGAG-Z0598	lane1-s229-index-TTCCTAGGTGAG-Z0598	NC3-34	86	Unexposed	F	323	26.5	0	0	0	0	0	0	0	1.736	3	0	86_Unexposed
lane1-s230-index-GCACGACAACAC-Z0599	lane1-s230-index-GCACGACAACAC-Z0599	NC3-35	86	Unexposed	F	402	27.5	0	0	0	0	0	0	0	1.933	3	0	86_Unexposed
lane1-s231-index-ATCGATCTGTGG-Z0600	lane1-s231-index-ATCGATCTGTGG-Z0600	PC1-31	86	Exposed	M	264	27	2	1	1	0	0	0	1	1.341	4	1	86_Exposed
lane1-s232-index-CTTGTGTCGATA-Z0601	lane1-s232-index-CTTGTGTCGATA-Z0601	PC1-32	86	Exposed	F	172	26.5	6	3	3	0	12	3	2	0.924	4	5	86_Exposed
lane1-s233-index-TGAGCCGGAATC-Z0602	lane1-s233-index-TGAGCCGGAATC-Z0602	PC1-33	86	Exposed	F	314	27	3	1	2	0	3	2	1	1.595	4	3	86_Exposed
lane1-s234-index-GCGGCAATTACG-Z0603	lane1-s234-index-GCGGCAATTACG-Z0603	PC1-34	86	Exposed	F	416	27	1	0	1	0	0	0	0	2.113	4	0	86_Exposed
lane1-s235-index-GAACTAGTCACC-Z0604	lane1-s235-index-GAACTAGTCACC-Z0604	PC1-35	86	Exposed	F	226	25	2	0	2	0	0	3	1	1.446	4	4	86_Exposed
lane1-s236-index-GACGGAACCCAT-Z0605	lane1-s236-index-GACGGAACCCAT-Z0605	PC2-32	86	Exposed	M	236	25	1	0	1	0	4	0	0	1.51	5	0	86_Exposed
lane1-s237-index-CAAGCATGCCTA-Z0606	lane1-s237-index-CAAGCATGCCTA-Z0606	PC2-33	86	Exposed	M	136	24	2	0	2	0	2	3	0	0.984	5	3	86_Exposed
lane1-s238-index-CCTGAACTAGTT-Z0607	lane1-s238-index-CCTGAACTAGTT-Z0607	PC2-34	86	Exposed	M	321	28	0	0	0	0	0	0	0	1.462	5	0	86_Exposed
lane1-s239-index-CTTCGGCAGAAT-Z0608	lane1-s239-index-CTTCGGCAGAAT-Z0608	PC2-35	86	Exposed	F	232	26.5	1	0	1	0	3	2	2	1.247	5	4	86_Exposed
lane1-s240-index-ACGGGACATGCT-Z0609	lane1-s240-index-ACGGGACATGCT-Z0609	PC3-31	86	Exposed	M	182	27	7	1	6	0	10	3	2	0.925	6	5	86_Exposed
lane1-s241-index-GTCATATCGTAC-Z0610	lane1-s241-index-GTCATATCGTAC-Z0610	PC3-32	86	Exposed	F	669	30	3	2	1	0	2	2	1	2.478	6	3	86_Exposed
lane1-s242-index-GGAAACCACCAC-Z0611	lane1-s242-index-GGAAACCACCAC-Z0611	PC3-33	86	Exposed	M	110	20.5	0	0	0	0	0	1	0	1.277	6	1	86_Exposed
lane1-s244-index-ACATTCAGCGCA-Z0613	lane1-s244-index-ACATTCAGCGCA-Z0613	PC3-35	86	Exposed	F	414	27.5	6	1	5	0	0	0	1	1.991	6	1	86_Exposed
